# Supplementary material for: Prevalence and Drivers of Treatment Seeking Behaviour among Under-five Children Experiencing Acute Respiratory Infection in India
Source: Research Square preprint supplement (doi:10.21203/rs.3.rs-6194991/v1), 2025-04-21
Supplement: Supplementary file 1 [file 90acff6fba2b4502422882dc.docx]

**Supplementary file 1:** Variance inflation factors with treatment seeking behaviour in NFHS-IV (2015-16) and NFHS-V (2019-21)

| Background Variable | NFHS-IV | | NFHS-V | |
| --- | --- | --- | --- | --- |
| VIF | 1/VIF | VIF | 1/VIF |
| **Place of Resident** |  |  |  |  |
| *Urban* |  |  |  |  |
| *Rural* | 1.27 | 0.79 | 1.21 | 0.83 |
| **Household Wealth Index** |  |  |  |  |
| Poorest |  |  |  |  |
| Poorer | 1.73 | 0.58 | 1.53 | 0.65 |
| Middle | 2.00 | 0.50 | 1.72 | 0.58 |
| Richer | 2.14 | 0.47 | 1.86 | 0.54 |
| Richest | 2.26 | 0.44 | 2.09 | 0.48 |
| **Gender of the head of the Household** |  |  |  |  |
| *Male* |  |  |  |  |
| *Female* | 1.01 | 0.99 | 1.04 | 0.96 |
| **Household Size** |  |  |  |  |
| *4 Members* |  |  |  |  |
| *5 and more members* | 1.16 | 0.86 | 1.17 | 0.86 |
| **Religious group** |  |  |  |  |
| Hindu |  |  |  |  |
| Non-Hindu | 1.39 | 0.72 | 1.41 | 0.71 |
| **Social Group** |  |  |  |  |
| *SC* |  |  |  |  |
| *ST* | 1.93 | 0.52 | 1.84 | 0.54 |
| *OBC* | 1.89 | 0.53 | 1.75 | 0.57 |
| *Others* | 1.88 | 0.53 | 1.74 | 0.58 |
| **Distance to health facility** |  |  |  |  |
| *No/not a big problem* |  |  |  |  |
| *Big problem* | 1.99 | 0.50 | 1.75 | 0.57 |
| **Having to take transport** |  |  |  |  |
| *No/not a big problem* |  |  |  |  |
| *Big problem* | 2.03 | 0.49 | 1.77 | 0.56 |
| **Mother's literacy** |  |  |  |  |
| Illiterate |  |  |  |  |
| literate | 1.40 | 0.72 | 1.26 | 0.80 |
| **Mass Media Exposure** |  |  |  |  |
| No |  |  |  |  |
| Yes | 1.48 | 0.68 | 1.33 | 0.75 |
| **Children ever born to women** |  |  |  |  |
| One children |  |  |  |  |
| Two Children | 1.53 | 0.65 | 1.48 | 0.68 |
| More than 2 children | 1.85 | 0.54 | 1.83 | 0.55 |
| **Age of the child** |  |  |  |  |
| 0-11 Months |  |  |  |  |
| 12-23 Months | 1.56 | 0.64 | 1.54 | 0.65 |
| 24-35 Months | 1.50 | 0.67 | 1.50 | 0.67 |
| 36 to 47 Months | 1.50 | 0.67 | 1.50 | 0.67 |
| 48 to 59 Months | 1.46 | 0.69 | 1.50 | 0.67 |
| **Sex of the Child** |  |  |  |  |
| Boy |  |  |  |  |
| Girl | 1.01 | 0.99 | 1.01 | 0.99 |
| **Region in India** |  |  |  |  |
| North |  |  |  |  |
| Central | 2.98 | 0.34 | 2.72 | 0.37 |
| East | 2.17 | 0.46 | 2.32 | 0.43 |
| Northeast | 1.94 | 0.52 | 2.31 | 0.43 |
| West | 1.30 | 0.77 | 1.53 | 0.65 |
| South | 1.45 | 0.69 | 1.64 | 0.61 |
| **State** |  |  |  |  |
| Non EAG |  |  |  |  |
| EAG | 3.45 | 0.29 | 3.82 | 0.26 |
| Mean VIF | 1.76 |  | 1.72 |  |
